# Supplementary material
Source: PubMed Central journal article supplement (PMC6138436)

# APPENDIX

## **Error-free DNA damage tolerance pathway is facilitated by the Irc5 translocase through cohesin**

Ireneusz Litwin, Tomasz Bakowski, Barnabas Szakal, Ewa Pilarczyk, Ewa Maciaszczyk-Dziubinska, Dana Branzei & Robert Wysocki

### Appendix Contents:

1. Appendix Table S1
2. Appendix Table S2
3. Appendix Figure Legends
4. Appendix Figure S1
5. Appendix Figure S2
6. Appendix Figure S3
7. Appendix Figure S4

## Appendix Table S1

Yeast strains used in this work.

| Strain    | Genotype                                                                     | Source         |
|-----------|------------------------------------------------------------------------------|----------------|
| W303-1a   | <i>MATa ade2-1 can1-100 ura3-1 his3-11,15 leu2-3,112 trp1-1 RAD5</i>         | R. Rothstein   |
| IL012     | W303-1a, <i>irc5-Δ1::TRP1</i>                                                | Lab collection |
| W3749-14C | W303-1a, <i>ADE2, bar1::LEU2, RAD52-YFP</i>                                  | R. Rothstein   |
| TB039     | W3749-14C, <i>irc5-Δ1::TRP1</i>                                              | This study     |
| BYR52MN   | BY4741, <i>MATa his3Δ1 leu2Δ0 ura3Δ0 met15Δ0</i><br><i>RAD52-MN::HIS3MX6</i> | F. Prado       |
| TB040     | BYR52MN, <i>irc5-Δ1::kanMX6</i>                                              | This work      |
| W3775-12C | W303-1a, <i>ADE2, bar1::LEU2, RFA1-YFP</i>                                   | R. Rothstein   |
| TB041     | W3775-12C, <i>irc5-Δ1::TRP1</i>                                              | This study     |
| TB042     | W3775-12C, <i>ura3-1::IRC5-3HA-URA3, irc5-Δ1::TRP1</i>                       | This study     |
| TB043     | W3775-12C, <i>ura3-1::irc5<sup>DAEA</sup>-3HA-URA3, irc5-Δ1::TRP1</i>        | This study     |
| TB044     | W3749-14C, <i>ura3-1::IRC5-3HA-URA3, irc5-Δ1::TRP1</i>                       | This study     |
| TB045     | W3749-14C, <i>ura3-1::irc5<sup>DAEA</sup>-3HA-URA3, irc5-Δ1::TRP1</i>        | This study     |
| EMD09     | W303-1a, <i>ura3-1::IRC5-3HA-URA3, irc5-Δ1::TRP1</i>                         | This study     |
| EMD10     | W303-1a, <i>ura3-1::irc5<sup>DAEA</sup>-3HA-URA3, irc5-Δ1::TRP1</i>          | This study     |
| MC002     | W303-1a, <i>rad51Δ::kanMX6</i>                                               | Lab collection |
| TB046     | W303-1a, <i>irc5-Δ1::TRP1 rad51Δ::kanMX6</i>                                 | This study     |
| MC006     | W303-1a, <i>rad52Δ::kanMX6</i>                                               | Lab collection |
| TB047     | W303-1a, <i>irc5-Δ1::TRP1 rad52Δ::kanMX6</i>                                 | This study     |
| MC019     | W303-1a, <i>rad18Δ::kanMX6</i>                                               | Lab collection |
| TB048     | W303-1a, <i>irc5-Δ1::TRP1 rad18Δ::kanMX6</i>                                 | This study     |
| MC018     | W303-1a, <i>rad5Δ::kanMX6</i>                                                | Lab collection |
| TB049     | W303-1a, <i>irc5-Δ1::TRP1 rad5Δ::kanMX6</i>                                  | This study     |

|        |                                                                                |                |
|--------|--------------------------------------------------------------------------------|----------------|
| MC021  | W303-1a, <i>rev3Δ::kanMX6</i>                                                  | Lab collection |
| TB050  | W303-1a, <i>irc5-Δ1::TRP1 rev3Δ::kanMX6</i>                                    | This study     |
| MC012  | W303-1a, <i>sgs1Δ::kanMX6</i>                                                  | Lab collection |
| TB051  | W303-1a, <i>irc5-Δ1::TRP1 sgs1Δ::kanMX6</i>                                    | This study     |
| TB052  | W3775-12C, <i>rad18Δ::kanMX6</i>                                               | This study     |
| TB053  | W3775-12C, <i>rad18Δ::kanMX6 irc5-Δ1::TRP1</i>                                 | This study     |
| TB054  | W3775-12C, <i>rev3Δ::kanMX6</i>                                                | This study     |
| TB055  | W3775-12C, <i>rev3Δ::kanMX6 irc5-Δ1::TRP1</i>                                  | This study     |
| TB056  | W3775-12C, <i>sgs1Δ::kanMX6</i>                                                | This study     |
| TB057  | W3775-12C, <i>sgs1Δ::kanMX6 irc5-Δ1::TRP1</i>                                  | This study     |
| TB058  | W3749-14C, <i>rad18Δ::kanMX6</i>                                               | This study     |
| TB059  | W3749-14C, <i>rad18Δ::kanMX6 irc5-Δ1::TRP1</i>                                 | This study     |
| TB060  | W3749-14C, <i>rev3Δ::kanMX6</i>                                                | This study     |
| TB061  | W3749-14C, <i>rev3Δ::kanMX6 irc5-Δ1::TRP1</i>                                  | This study     |
| TB062  | W3749-14C, <i>sgs1Δ::kanMX6</i>                                                | This study     |
| TB063  | W3749-14C, <i>sgs1Δ::kanMX6 irc5-Δ1::TRP1</i>                                  | This study     |
| JC1315 | W303-1a, <i>SCC1-9PK::TRP1 URA3::GPD-TK7</i>                                   | J.Cobb         |
| TB064  | JC1315, <i>irc5-Δ1::kanMX6</i>                                                 | Lab collection |
| TB065  | W303-1a, <i>POL2-3HA::kanMX6</i>                                               | This study     |
| TB066  | TB065, <i>irc5-Δ1::TRP1</i>                                                    | This study     |
| Y39    | W303-1a, <i>ura3::3xURA3 tetO112, leu2::LEU2 tetR-GFP SCC1-6HA::HIS3</i>       | F. Uhlmann     |
| Y4366  | W303-1a, <i>scc2-4 ura3::3xURA3 tetO112 leu2::LEU2 tetR-GFP SCC1-6HA::HIS3</i> | F. Uhlmann     |
| TB067  | Y39, <i>SCC1, POL2-3HA::kanMX6</i>                                             | This study     |
| TB068  | Y4366, <i>scc2-4, SCC1, POL2-3HA::kanMX6</i>                                   | This study     |
| TB069  | W303-1a, <i>scc2-4</i>                                                         | This study     |
| TB070  | W303-1a, <i>scc2-4 irc5-Δ1::TRP1</i>                                           | This study     |
| TB071  | W3775-12C, <i>scc2-4</i>                                                       | This study     |

|        |                                          |            |
|--------|------------------------------------------|------------|
| TB072  | W3775-12C, <i>scc2-4 irc5-Δ1::TRP1</i>   | This study |
| TB073  | W3749-14C, <i>scc2-4</i>                 | This study |
| TB074  | W3749-14C, <i>scc2-4 irc5-Δ1::TRP1</i>   | This study |
| JC1339 | W303-1a, <i>scc1-73; pepΔ::LEU2</i>      | J Cobb     |
| TB075  | JC1339, <i>irc5-Δ1::TRP1</i>             | This study |
| TB076  | W3775-12C, <i>scc1-73</i>                | This study |
| TB077  | W3775-12C, <i>scc1-73 irc5-Δ1::TRP1</i>  | This study |
| TB078  | W3749-14C, <i>scc1-73</i>                | This study |
| TB079  | W3749-14C, <i>scc1-73 irc5-Δ1::TRP1</i>  | This study |
| TB080  | W3775-12C, <i>scc2-4 rad18Δ::kanMX6</i>  | This study |
| TB081  | W3775-12C, <i>scc2-4 rev3Δ::kanMX6</i>   | This study |
| TB082  | W3749-14C, <i>scc2-4 rad18Δ::kanMX6</i>  | This study |
| TB083  | W3749-14C, <i>scc2-4 rev3Δ::kanMX6</i>   | This study |
| TB084  | W3775-12C, <i>scc1-73 rad18Δ::kanMX6</i> | This study |
| TB085  | W3775-12C, <i>scc1-73 rev3Δ::kanMX6</i>  | This study |
| TB086  | W3749-14C, <i>scc1-73 rad18Δ::kanMX6</i> | This study |
| TB087  | W3749-14C, <i>scc1-73 rev3Δ::kanMX6</i>  | This study |

## Appendix Table S2

Oligonucleotide sets used in this work.

| <b>Amplified region</b> | <b>Forward primer</b>     | <b>Reverse primer</b>      |
|-------------------------|---------------------------|----------------------------|
| <i>ARS305</i>           | TTTGGAGCTCAAGTGGATTGAG    | TGAAACTGGACATATTTGAGGAATTT |
| <i>ARS305 + 7kb</i>     | AAGTTCCGCTTTCATATCTTTGTTT | GAGATGAATGGTTGACTAACGTGGTA |
| <i>ARS607</i>           | CGGCTCGTGCATTAAGCTTG      | TGCCGCACGCCAAACATTGC       |
| <i>ARS501</i>           | GAATGTGTCTACGTAATTGG      | CCTTTCTTTTGGAGCTGCTA       |
| <i>POA1</i>             | AAACGGCCACATCAAATACC      | TCCAAGGGACTCCGAATATG       |
| <i>ACT1</i>             | GGCCAAATCGATTCTCAAAA      | GCCTTCTACGTTTCCATCCA       |

## Appendix Figure Legends

### Appendix Figure S1. Genetic interactions between *irc5-Δ1*, homologous recombination and DNA damage tolerance-related mutants.

Logarithmically growing WT (W303-1a), *irc5-Δ1* (IL012), *rad51Δ* (MC002), *irc5-Δ1 rad51Δ* (TB046) (A), *rad52Δ* (MC006), *irc5-Δ1 rad52Δ* (TB047) (B), *rad18Δ* (MC019), *irc5-Δ1 rad18Δ* (TB048) (C), *rad5Δ* (MC018), *irc5-Δ1 rad5Δ* (TB049) (D), *rev3Δ* (MC021), *irc5-Δ1 rev3Δ* (TB050) (E), *sgs1Δ* (MC012) and *irc5-Δ1 sgs1Δ* (TB051) (F) cultures were incubated for 1 hour with the indicated concentrations of MMS. Next, cells were plated on YPD to determine the survival rate. Error bars represent mean value  $\pm$  standard deviations of mean (n=4).

### Appendix Figure S2. Levels of Rfa1-YFP and Rad52-YFP DNA repair foci in DTT mutants devoid of *IRC5*.

Logarithmically growing WT (W3775-12C or W3749-14C), *irc5-Δ1* (TB039 or TB041), *rad18Δ* (TB052 or TB058), *irc5-Δ1 rad18Δ* (TB053 or TB059) (A and B), *rev3Δ* (TB054 or TB060), *irc5-Δ1 rev3Δ* (TB055 or TB061) (C and D), *sgs1Δ* (TB056 or TB062) and *irc5-Δ1 sgs1Δ* (TB057 or TB063) (E and F) cultures were incubated or not with 0.0025% MMS for 1 hour. Next, cells were washed with water and processed for microscopic analysis. Error bars represent mean value  $\pm$  standard deviations of mean (n=4). Unpaired t-test was used to calculate the P-value.

### Appendix Figure S3. Disruption of *IRC5* results in decreased formation of recombination intermediates during TS.

*sgs1Δ* (MC012) and *irc5-Δ1 sgs1Δ* (TB051) cells were synchronized in G1 with alpha-factor and released in media containing 0.03% MMS. The amount of replication intermediates at *ARS301* was analyzed by 2D gel. Schematic representation of major 2D gel signals and DNA fragment analyzed are presented. Measurement of DNA content by FACS and X-molecule quantification are displayed (n=2).

### Appendix Figure S4. Genetic interactions between *irc5-Δ1* and cohesin pathway mutants.

Logarithmically growing cultures of wild type (W303-1a), *irc5-Δ1* (IL012), *scc2-4* (TB069) and *irc5-Δ1 scc2-4* (TB070) (A), *scc1-73* (JC1339) and *irc5-Δ1 scc1-73* (TB075) (B) cultures were incubated for 1 hour with the indicated concentrations of MMS at 25°C or 30°C. Next, cells were plated on YPD to determine the survival rate. Error bars represent mean value  $\pm$  standard deviations of mean (n=4).

**A**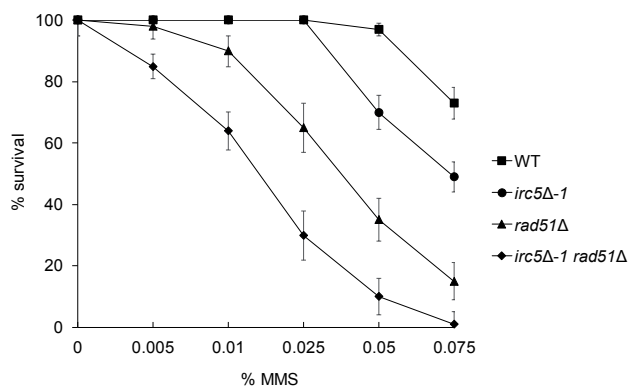**B**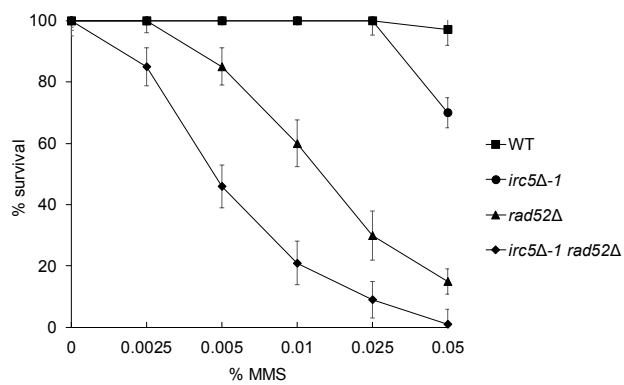**C**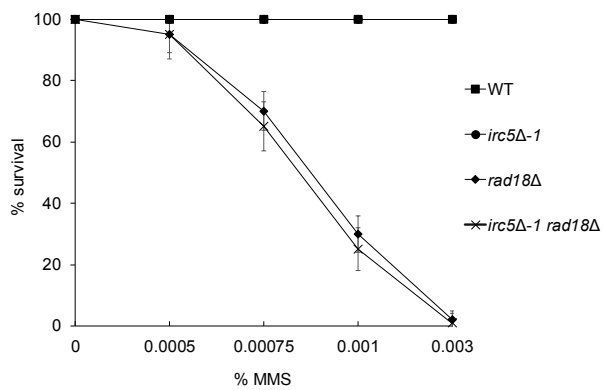**D**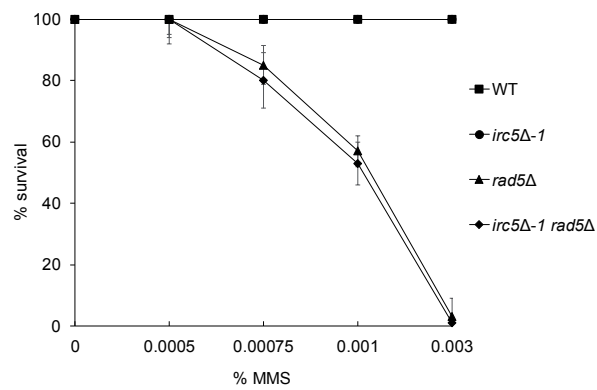**E**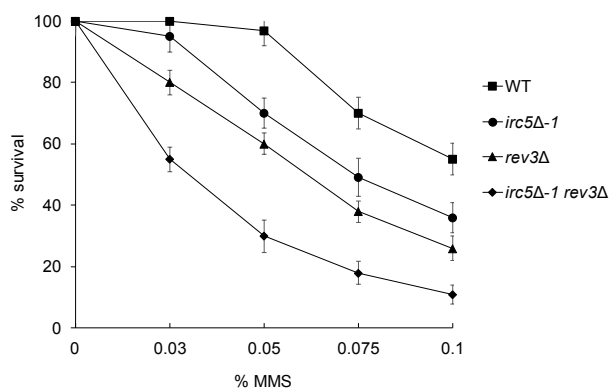**F**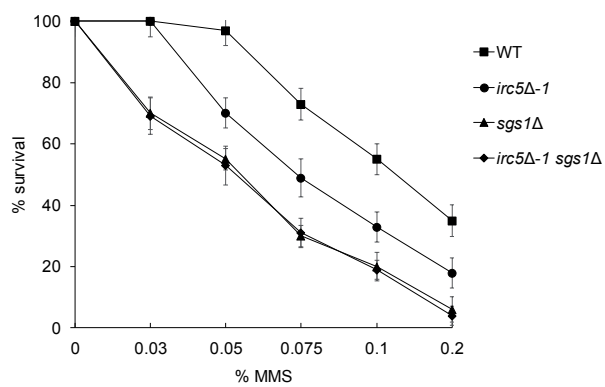

**A**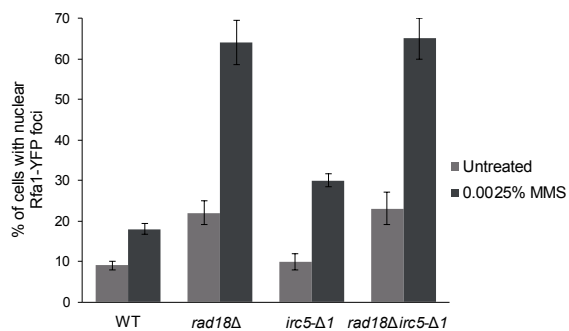**B**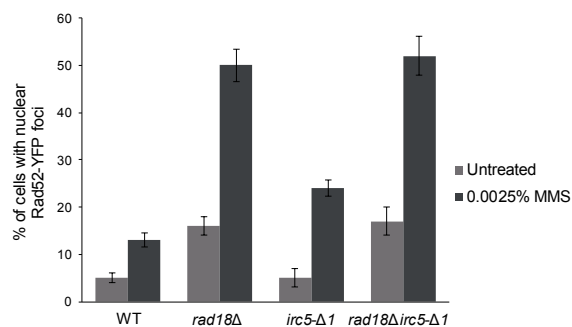**C**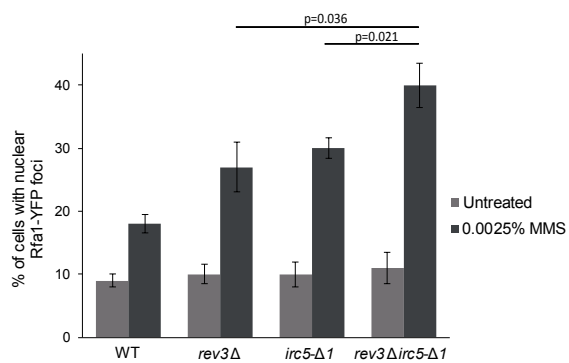**D**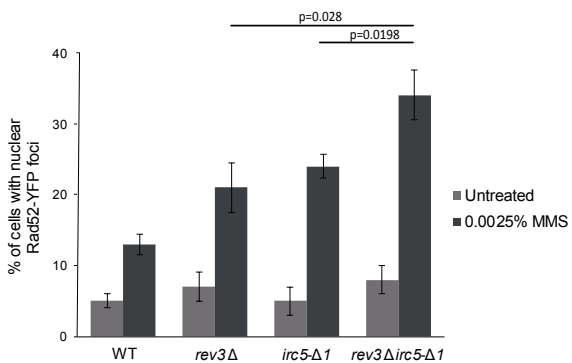**E**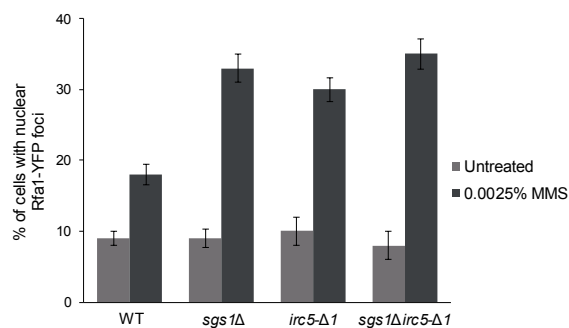**F**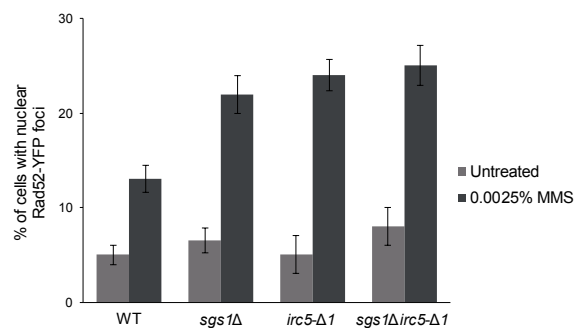



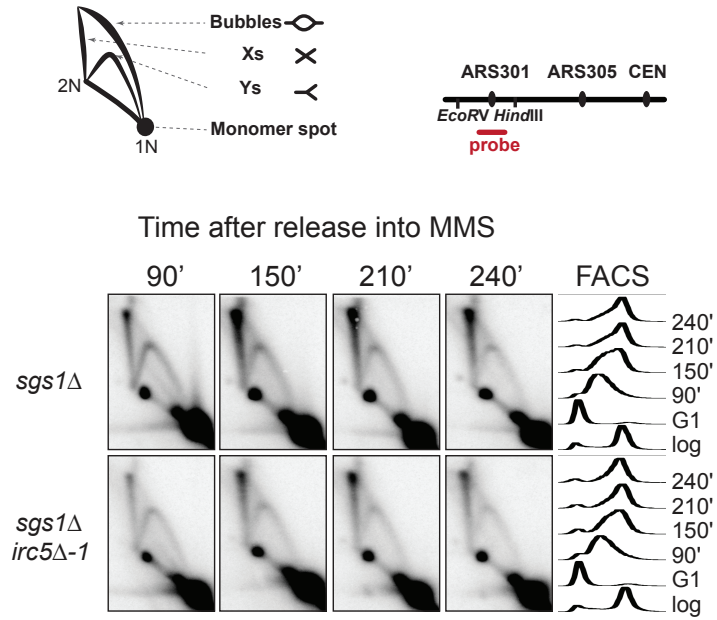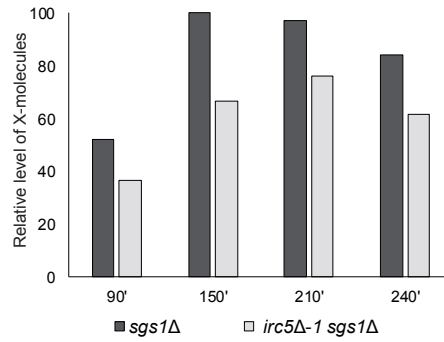

**A**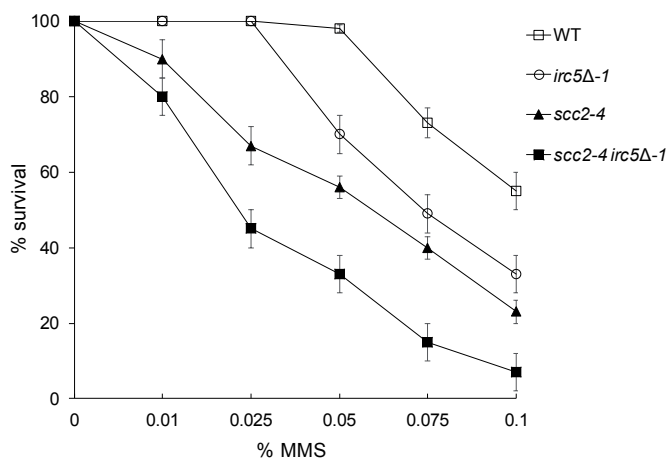**B**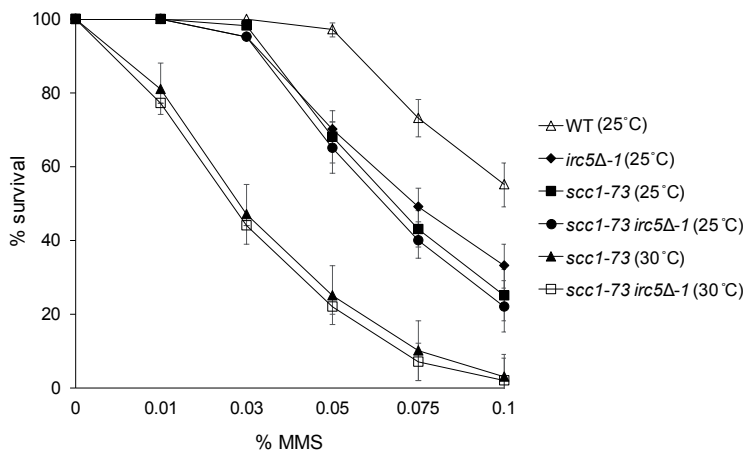

Supplement: EMBJ-37-e98732-s001.pdf [file EMBJ-37-e98732-s001.pdf]
